# Supplementary material for: All-polymer field-effect transistors using a brush gate dielectric
Source: Royal Society of Chemistry journal article supplement (doi:10.1039/c3tc31076k), 2013-01-01
Supplement: c3tc31076k.pdf [file c3tc31076k.pdf]

Supporting information

All-polymer field-effect transistors using a brush gate dielectric

Ana B. Rodríguez, Michael R. Tomlinson, Saghar Khodabakhsh, Jui-Fen Chang, Fabrice Cousin, Dieter Lott, Henning Sirringhaus, Wilhelm T. S. Huck, Anthony M. Higgins, and Mark Geoghegan

**Table S1.** Mobility, threshold voltages ( $V_T$ ), and on/off ratios for all of the devices measured. Threshold voltages are obtained from the  $I_d^{1/2}(V_g)$  transfer characteristics in the saturated regime ( $V_d = -60$  V), and the on/off ratios are also taken from the transfer characteristics with  $V_d = V_g = -60$  V.

|                  | Mobility ( $\text{cm}^2 \text{V}^{-1} \text{s}^{-1}$ ) |                       | $V_T$ (V) |        | on/off ratio |        |
|------------------|--------------------------------------------------------|-----------------------|-----------|--------|--------------|--------|
|                  | P3HT22                                                 | P3HT42                | P3HT22    | P3HT44 | P3HT22       | P3HT42 |
| 700 nm PMMA film | $9.7 \times 10^{-4}$                                   | $1.02 \times 10^{-3}$ | -5.6      | -13.3  | 579          | 318    |
| 24 h at 40°C     | $1.02 \times 10^{-3}$                                  | $3.8 \times 10^{-4}$  | -7.2      | -14.6  | 863          | 265    |
| 5 min at 78°C    | $1.17 \times 10^{-3}$                                  | $4.3 \times 10^{-4}$  | -5.6      | -10.3  | 632          | 430    |
| 24 h at 78°C     | $1.61 \times 10^{-3}$                                  | $3.1 \times 10^{-4}$  | -0.8      | -3.3   | 148          | 110    |
| 5 min at 100°C   | $1.28 \times 10^{-3}$                                  | $3.4 \times 10^{-4}$  | -0.3      | -9.8   | 551          | 302    |
| 24 h at 100°C    | $1.28 \times 10^{-3}$                                  | $2.3 \times 10^{-4}$  | -0.3      | 4.4    | 175          | 42     |
| 5 min at 150°C   | $1.06 \times 10^{-3}$                                  | $2.6 \times 10^{-4}$  | -3.3      | -9.9   | 292          | 183    |
| 24 h at 150°C    | $9.0 \times 10^{-4}$                                   | $2.2 \times 10^{-4}$  | -11.0     | -7.2   | 17           | 101    |

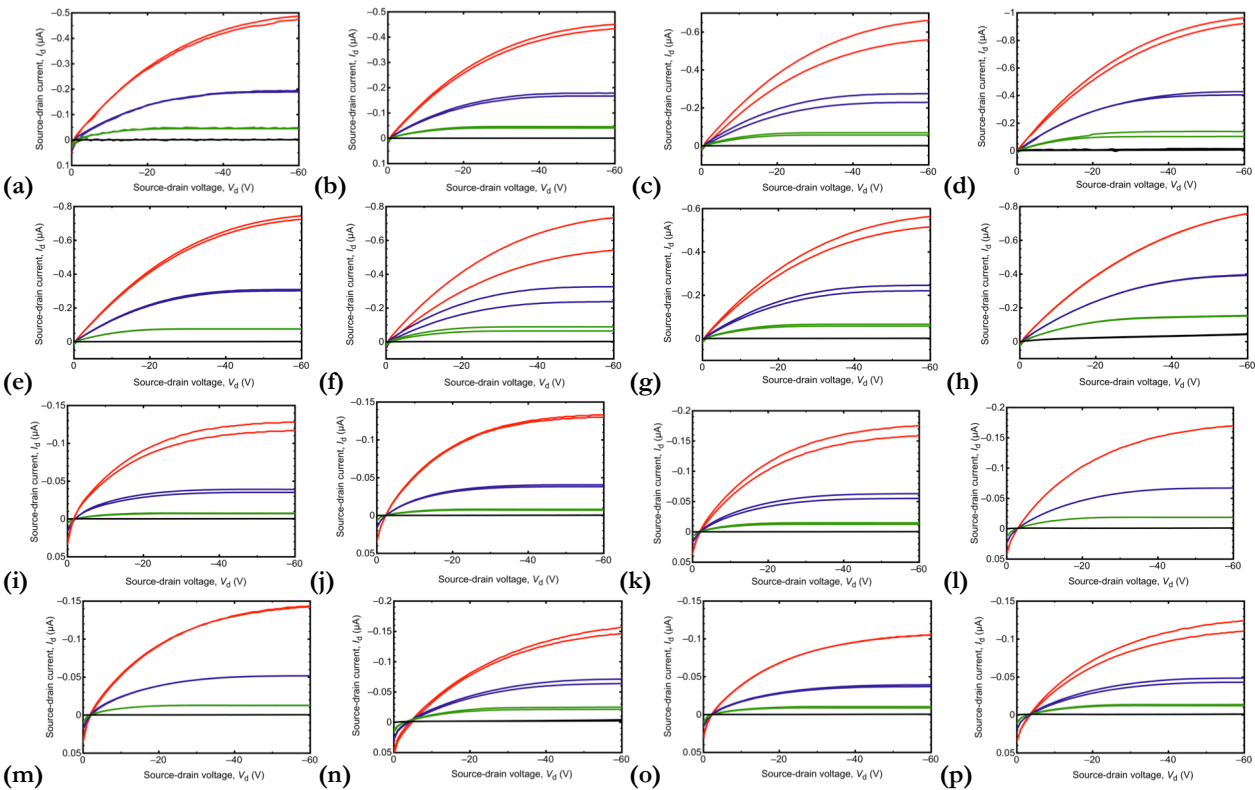

**Figure S1.** Output characteristics of P3HT22 (a)-(h) and P3HT42 (i)-(p) FETs with PMMA brushes as gate insulators. (a) and (i) Reference samples, using a 700 nm-thick PMMA film spin-coated from n-butyl acetate rather than a brush, and with no heat treatment before or after P3HT deposition; (b) and (j) samples annealed at 40°C for 24 h; (c) and (k) samples annealed at 78°C for 5 min; (d) and (l) samples annealed at 78°C for 24 h (for (l) only one measurement was taken); (e) and (m) samples annealed at 100°C for 5 min; (f) and (n) samples annealed at 100°C for 24 h; (g) and (o) samples annealed at 150°C for 5 min; and (h) and (p) samples annealed at 150°C for 24 h. The gate voltages are  $V_g = 0, -20, -40$ , and  $-60$  V and are indicated by red, blue, green, and black curves respectively.
